# Supplementary material for: Genomic Insights Into Energy Metabolism of Carboxydocella thermautotrophica Coupling Hydrogenogenic CO Oxidation With the Reduction of Fe(III) Minerals
Source: Front Microbiol. 2018 Aug 3;9:1759. doi: 10.3389/fmicb.2018.01759 (PMC6085454; doi:10.3389/fmicb.2018.01759)
Supplement: Supplementary file 1 [file Table_1.XLSX]

## Sheet: Лист1
Supplementary Table S1. The distribution of hits to COG functional categories in the genomes of C. thermautotrophica strains.
COG Functional Category	Total count			Percentage
	019 chromosome	041 chromosome	041 plasmid	019 chromosome	041 chromosome	041 plasmid
Amino acid transport and metabolism	186	191	0	6.22	6.37	0
Carbohydrate transport and metabolism	99	111	0	3.31	3.7	0
Cell cycle control, cell division, chromosome partitioning	39	38	1	1.3	1.27	1.96
Cell motility	58	59	1	1.94	1.97	1.96
Cell wall/membrane/envelope biogenesis	97	99	0	3.24	3.3	0
Chromatin structure and dynamics	2	2	0	0.07	0.07	0
Coenzyme transport and metabolism	121	121	0	4.05	4.04	0
Defense mechanisms	32	30	4	1.07	1	7.84
Energy production and conversion	189	186	0	6.32	6.21	0
Extracellular structures	13	16	0	0.43	0.53	0
Function unknown	102	101	1	3.41	3.37	1.96
General function prediction only	151	153	0	5.05	5.11	0
Inorganic ion transport and metabolism	100	100	0	3.34	3.34	0
Intracellular trafficking, secretion, and vesicular transport	28	29	4	0.94	0.97	7.84
Lipid transport and metabolism	68	69	0	2.27	2.3	0
Mobilome: prophages, transposons	16	14	0	0.53	0.47	0
Nucleotide transport and metabolism	62	62	0	2.07	2.07	0
Posttranslational modification, protein turnover, chaperones	80	80	0	2.67	2.67	0
Replication, recombination and repair	77	76	5	2.57	2.54	9.8
Secondary metabolites biosynthesis, transport and catabolism	24	24	0	0.8	0.8	0
Signal transduction mechanisms	121	119	0	4.05	3.97	0
Transcription	113	113	0	3.78	3.77	0
Translation, ribosomal structure and biogenesis	180	179	0	6.02	5.97	0
Not in COG	1033	1025	35	34.54	34.2	68.63
Total	2991	2997	51	100	100	100
